# Supplementary figures and images for: Assessing the predictive role of platelet-lymphocyte ratio in EGFR-mutated non-small cell lung cancer patients treated with tyrosine kinase inhibitors: an analysis across TKI generations
Source: PubMed Central journal article supplement — Discov Oncol. 2024 Nov 21;15:689. doi: 10.1007/s12672-024-01606-9 (PMC11582238; doi:10.1007/s12672-024-01606-9), 2024-11-21

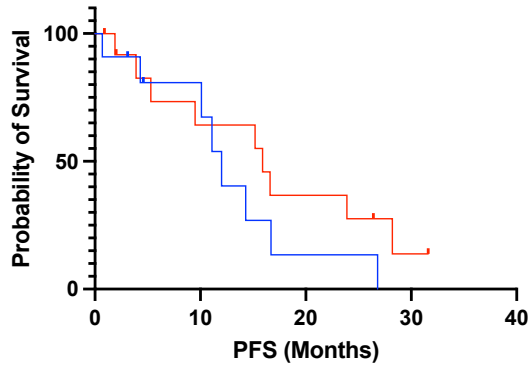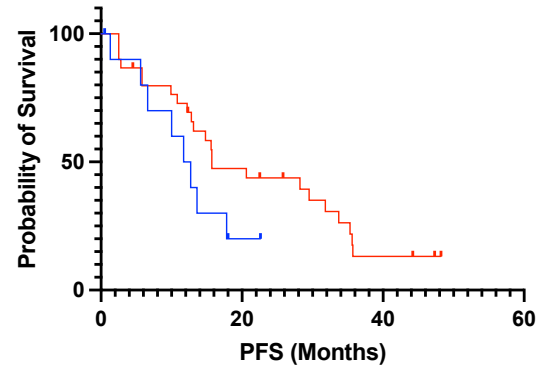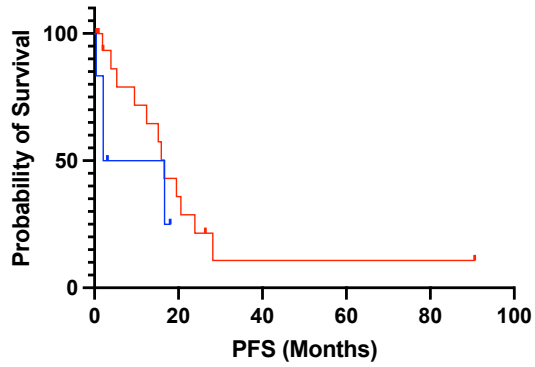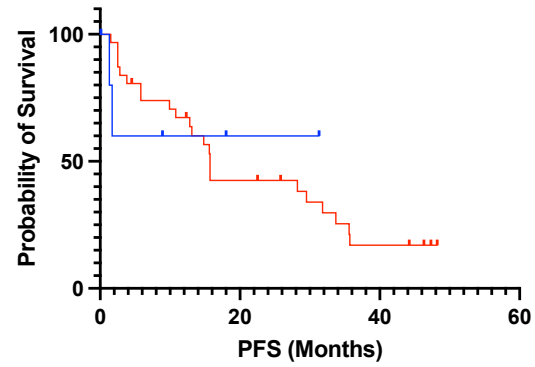

Supplement: 12672_2024_1606_MOESM1_ESM.pdf [file 12672_2024_1606_MOESM1_ESM.pdf]
